# Supplementary material
Source: HighWire-hosted journal article supplement (https://ijgc.bmj.com/content/29/9/1449)

Valencia, Spain  
1st July 2019

Dear, Editor in chief:

We are pleased to submit the manuscript entitled "Sentinel Lymph node in apparent early ovarian cancer: Open technique" to the IJGC for publication as Video article.

The manuscript describes the sentinel lymph node open technique in early stage apparent ovarian cancer. In our opinion the article suits to the aim of the journal and would be very interesting for your readers.

This novel technique is a hot topic in gynecological cancer, not previously published or reported in video.

All of the authors (V ctor Lago, Pilar Bello, Tiermes Marina, Beatriz Montero, Pablo Padilla-Iserte, Susana Lopez and Santiago Domingo) of the present manuscript declare that there are no conflicts of interest and have actively participated in the work providing input including:

- 1) substantial contributions to conception and study design
- 2) drafting of the article
- 3) final approval of the version to be published.

We declare not to have any conflict of interest.

Sincerely,

Victor Lago Le 

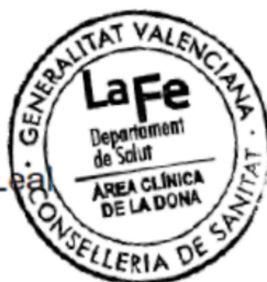

Supplement: inline-supplementary-material-1 [file inline-supplementary-material-1.pdf]
